# Supplementary material for: MiR-195Inhibits Tumor Growth and Metastasis in Papillary Thyroid Carcinoma Cell Lines by TargetingCCND1andFGF2
Source: Hindawi journal article supplement (doi:10.1155/2017/6180425), 2017-01-01
Supplement: f1 [file 6180425.f1.pdf]

**Article title:** MiR-195 inhibits tumor growth and metastasis in papillary thyroid carcinoma **cell lines** by targeting CCND1 and FGF2

**Journal name:** International Journal of Endocrinology

**Author names:**

Yali Yin<sup>1\*</sup>, Shubin Hong<sup>1\*</sup>, Shuang Yu<sup>1</sup>, Yanrui Huang<sup>1</sup>, Shuwei Chen<sup>2,3</sup>, Yujie Liu<sup>4</sup>, Quan Zhang<sup>2</sup>, Yanbing Li<sup>1</sup>, Haipeng Xiao<sup>1 #</sup>

**Institutional addresses:**

<sup>1</sup>Department of Endocrinology, The First Affiliated Hospital of Sun Yat-Sen University, Guangzhou, 510080, China.

<sup>2</sup>Department of Head and Neck Surgery, Sun Yat-Sen University Cancer Center, Guangzhou, 510060, China.

<sup>3</sup>State Key Laboratory of Oncology in South China, Collaborative Innovation Center of Cancer Medicine, Guangzhou, China.

<sup>4</sup>Breast Tumor Center, Sun Yat-Sen Memorial Hospital, Sun Yat-Sen University, Guangzhou, 510120, China.

**Author E-mail:**

Yali Yin: smart\_yyl@163.com; Shubin Hong: robin151208@sina.com; Shuang Yu: shuang.yu@aliyun.com; Yanrui Huang: you9251@163.com; Shuwei Chen: chenshuw@sysucc.org.cn; Yujie Liu: liuyujie554@163.com; Quan Zhang: zhangquan@sysucc.org.cn; Yanbing Li: easd04lyb@126.com; Haipeng Xiao: xiaohp@mail.sysu.edu.cn

\*These authors have contributed equally to this work.

# Correspondence: Haipeng Xiao, xiaohp@mail.sysu.edu.cn, T: 86(20)87755776-8803.

Running title : Downregulation of *miR-195* in papillary thyroid carcinoma.

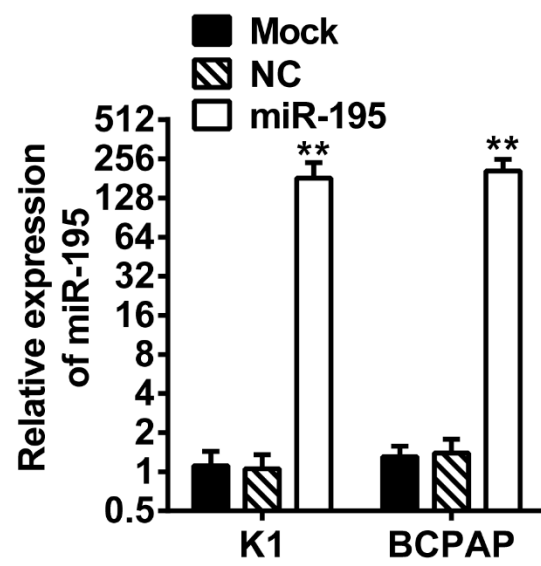

**Supplementary Fig. 1.** The relative expression of *miR-195* in mimics transfected cells is significantly higher than control cells. \*\*  $P < 0.01$ , compared with control group.

**Supplementary Table 1.** Clinicopathologic features of PTC with associated miR-195 relative expression

| <i>Clinicopathologic features</i> | <i>n</i> | <i>miR-195</i> | <i>P value</i> |
|-----------------------------------|----------|----------------|----------------|
| Age, years                        |          |                |                |
| <45                               | 28       | 0.69±0.31      | 0.33           |
| ≥45                               | 10       | 0.80±0.38      |                |
| Sex                               |          |                |                |
| Male                              | 12       | 0.73±0.35      | 0.86           |
| Female                            | 26       | 0.71±0.32      |                |
| Tumor size, cm                    |          |                |                |
| <2                                | 20       | 0.70±0.33      | 0.79           |
| ≥2                                | 18       | 0.73±0.34      |                |
| Multicentricity                   |          |                |                |
| No                                | 25       | 0.73±0.33      | 0.80           |
| Yes                               | 13       | 0.70±0.34      |                |
| Extrathyroidal invasion           |          |                |                |
| No                                | 15       | 0.78±0.38      | 0.14           |
| Yes                               | 23       | 0.63±0.21      |                |
| Cervical LN metastasis            |          |                |                |
| No                                | 11       | 0.87±0.36      | 0.07           |
| Yes                               | 27       | 0.66±0.28      |                |
| TNM stage                         |          |                |                |
| I/II                              | 28       | 0.81±0.38      | 0.33           |
| III/IV                            | 10       | 0.69±0.31      |                |

PTC, papillary thyroid carcinoma; LN, lymph node; TNM, tumor, node, metastasis, classification.
